# Supplementary material
Source: publisher figshare collection journal article supplement (https://sage.figshare.com/ndownloader/files/12712136)
Supplement: Supplementary file 1 [file 12712136]

## **Supplemental Material**

### **Supplemental Methods: Eligibility Criteria**

**Supplemental Table 1.** Comparison of baseline characteristics between the EsDEPACS participants who were followed up and those who exited after the baseline evaluation.

**Supplemental Table 2.** Intervention dosages and cardiovascular medications.

## **Supplemental Methods**

### **Eligibility Criteria**

Inclusion criteria were as follows: i) aged 18~85 years; ii) confirmed ACS by coronary angiography and laboratory tests; iii) ability to complete study questionnaires; iv) ability to understand the study objectives and sign informed consent; v) BDI>10; vi) major or minor depressive disorder according to DSM-IV criteria. Exclusion criteria were: i) occurrence of ACS while hospitalized for another reason; ii) ACS developing less than 3 months after a coronary artery bypass graft procedure; iii) uncontrolled hypertension (systolic blood pressure (BP) >180mmHg or diastolic BP >100mmHg); iv) resting heart rate <40/min; v) severe physical illnesses threatening life or interfering with the recovery from ACS; vi) persistent clinically significant laboratory abnormalities; vii) concomitant use of class I antiarrhythmic medications, reserpine, guanethidine, clonidine, methyldopa, lithium, anticonvulsants, antipsychotics, or antidepressants; viii) history of neuropsychiatric illnesses such as dementia, Parkinson's disease, brain tumor, psychosis, bipolar disorder, alcoholism, or other substance dependence; ix) pregnancy; x) participating in other drug trials.

**Supplemental Table 1** Comparison of baseline characteristics between the EsDEPACS participants who were followed up and those who exited after the baseline evaluation.

|                                     | <b>Escitalopram<br/>(N=108)</b> | <b>Placebo<br/>(N=109)</b> | <b>Total<br/>(N=217)</b> |
|-------------------------------------|---------------------------------|----------------------------|--------------------------|
| <b>Demographic characteristics</b>  |                                 |                            |                          |
| Age, mean (SD) year                 | 60.1 (10.9)                     | 58.5 (10.6)                | 59.3 (10.8)              |
| Gender, N (%) men                   | 67 (62.0)                       | 63 (57.8)                  | 130 (59.9)               |
| Education, mean (SD) year           | 9.4 (4.2)                       | 9.4 (4.1)                  | 9.4 (4.2)                |
| Living alone, N (%)                 | 8 (7.4)                         | 13 (11.9)                  | 21 (9.7)                 |
| Housing, N (%) rented               | 20 (18.5)                       | 24 (22.0)                  | 44 (20.3)                |
| Currently unemployed, N (%)         | 49 (45.4)                       | 54 (49.5)                  | 103 (47.5)               |
| <b>Depression characteristics</b>   |                                 |                            |                          |
| Previous depression, N (%)          | 6 (5.6)                         | 5 (4.6)                    | 11 (5.1)                 |
| Family history of depression, N (%) | 3 (2.8)                         | 5 (4.6)                    | 8 (3.7)                  |
| HAMD, mean (SD) score               | 15.9 (4.9)                      | 15.1 (4.3)                 | 15.5 (4.6)               |
| <b>Cardiac risk factors, N (%)</b>  |                                 |                            |                          |
| Previous ACS                        | 6 (5.6)                         | 8 (7.3)                    | 14 (6.5)                 |
| Family history of ACS               | 5 (4.6)                         | 4 (3.7)                    | 9 (4.1)                  |
| Hypertension                        | 63 (58.3)                       | 65 (59.6)                  | 128 (59.0)               |
| Diabetes mellitus                   | 34 (31.5)                       | 33 (30.3)                  | 67 (30.9)                |
| Hypercholesterolemia                | 51 (47.2)                       | 50 (45.9)                  | 101 (46.5)               |
| Obesity                             | 41 (38.0)                       | 54 (50.0)                  | 95 (43.8)                |
| Current smoker                      | 36 (33.3)                       | 28 (25.7)                  | 64 (29.5)                |
| <b>Current cardiac status</b>       |                                 |                            |                          |

|                               |             |             |             |
|-------------------------------|-------------|-------------|-------------|
| Killip class >1, N (%)        | 15 (13.9)   | 22 (20.2)   | 37 (17.1)   |
| LVEF, mean (SD) %             | 60.1 (10.9) | 62.4 (9.9)  | 61.3 (10.5) |
| Troponin I, mean (SD)         | 9.5 (8.4)   | 9.5 (7.5)   | 9.5 (7.9)   |
| Creatine kinase-MB, mean (SD) | 14.8 (14.2) | 14.8 (19.9) | 14.8 (17.3) |

---

No significant differences were found between the escitalopram and placebo groups using t-tests,  $\chi^2$ , or Fisher's exact tests as appropriate.

EsDEPACS = Escitalopram for DEPression in Acute Coronary Syndrome study; HAMD = Hamilton Depression Rating Scale; ACS = acute coronary syndrome; LVEF = left ventricular ejection fraction.

**Supplemental Table 2** Intervention dosages and cardiovascular medications. Data are N (%).

|                                                                                    | <b>Escitalopram</b> | <b>Placebo</b> |
|------------------------------------------------------------------------------------|---------------------|----------------|
|                                                                                    | <b>(N=108)</b>      | <b>(N=109)</b> |
| <b>Dosage of intervention at final EsDEPACS visit</b>                              |                     |                |
| 5mg                                                                                | 62 (57.4)           | 50 (45.9)      |
| 10mg                                                                               | 40 (37.0)           | 47 (43.1)      |
| 15mg                                                                               | 1 (0.9)             | 7 (6.4)        |
| 20mg                                                                               | 5 (4.6)             | 5 (4.6)        |
| <b>Cardiovascular medications received during the treatment period</b>             |                     |                |
| Calcium channel blockers                                                           | 38 (35.2)           | 48 (45.0)      |
| Nitrates                                                                           | 87 (80.6)           | 89 (81.7)      |
| Beta blockers                                                                      | 77 (71.3)           | 80 (73.4)      |
| Angiotensin converting enzyme inhibitors                                           | 36 (33.3)           | 43 (39.4)      |
| Angiotensin 2 receptor blocker                                                     | 58 (53.7)           | 58 (53.2)      |
| Statins                                                                            | 88 (81.5)           | 84 (77.1)      |
| Aspirin                                                                            | 99 (91.7)           | 98 (89.9)      |
| Antiplatelets                                                                      | 83 (76.9)           | 79 (72.5)      |
| Diuretics                                                                          | 25 (23.1)           | 21 (19.3)      |
| No significant differences were found between the two groups using $\chi^2$ tests. |                     |                |
